1 **Plant responses to multiple antagonists are mediated by order of attack and**  
2 **phytohormone crosstalk**

3

4 Saumik Basu<sup>1\*</sup>, Robert E. Clark<sup>1</sup>, Sayanta Bera<sup>2</sup>, Clare L. Casteel<sup>2</sup>, and David W. Crowder<sup>1</sup>

5

6 <sup>1</sup> Department of Entomology, Washington State University, Pullman, WA, USA, 99164

7 <sup>2</sup> School of Integrative Plant Science, Plant Pathology and Plant-Microbe Biology Section, Cornell

8 University, Ithaca, NY, USA 14850

## 9 Abstract

10 Plants are often attacked by multiple antagonists, and traits of the attacking organisms, and their  
11 order of arrival onto hosts, may affect plant defenses. However, few studies have assessed how  
12 multiple antagonists, and varying attack order, affect plant defense or nutrition. To address this,  
13 we assessed defensive and nutritional responses of *Pisum sativum* plants after attack by a vector  
14 herbivore (*Acrythosiphon pisum*), a non-vector herbivore (*Sitona lineatus*), and a pathogen (*Pea  
15 enation mosaic virus*, PEMV). We show PEMV-infectious *A. pisum* induced several pathogen-  
16 specific plant defense signals, but these defenses were inhibited when *S. lineatus* was present in  
17 peas infected with PEMV. *Sitona lineatus* also increased abundance of plant amino acids, but only  
18 when they attacked after PEMV-infectious *A. pisum*. Feeding by *S. lineatus* also promoted  
19 expression of several anti-herbivore defenses, but these defenses were inhibited when PEMV was  
20 also present. Our results suggest that diverse communities of biotic antagonists alter defense and  
21 nutritional traits of plants through complex pathways that depend on the identity of attackers and  
22 their order of arrival onto hosts. Moreover, simply examining the jasmonic and salicylic acid  
23 pathways may fail to reveal more complex pathways by which plants respond to biotic stress.

24

25 **Keywords:** disease ecology, plant-insect-pathogen interactions, plant defensive chemistry, plant  
26 nutrients, species interactions

27 **\*Correspondence:**

28 Saumik Basu

29 [saumik.basu@wsu.edu](mailto:saumik.basu@wsu.edu)

## 30 1 INTRODUCTION

31 Plant hosts have defenses to counter attacks from antagonists such as herbivores and pathogens  
32 (Pandey, Ramegowda, & Senthil-Kumar, 2015; Miller, Costa Alves, & Van Sluys, 2017). For  
33 example, the jasmonic acid pathway often regulates plant defenses against herbivores, while the  
34 salicylic acid pathway often regulates defenses against pathogens (Koornneef & Pieterse, 2008;  
35 Thaler, Humphrey, & Whiteman, 2012). While many studies have assessed plant responses to  
36 particular antagonists, plants are often challenged by many stressors concurrently, and plant  
37 defenses can depend on the order in which antagonists arrive on plants (Thaler et al., 2012; Nejat  
38 & Mantri, 2017). For example, herbivores often limit plant defenses against pathogens when they  
39 arrive first on plants, but herbivores often have few impacts on plant defenses against pathogens  
40 when they arrive after pathogens on plants (Okada, Abe, & Arimura, 2015; Lin et al., 2019). In  
41 other contexts, certain organisms ‘prime’ pathways, promoting defense against subsequent  
42 organisms activating the same pathway, such that attack order may not matter (Mauch-Mani,  
43 Baccelli, Luna, & Flors, 2017; Ramírez-Carrasco, Martínez-Aguilar, & Alvarez-Venegas, 2017).

44 Biotic stressors may also alter the nutritional quality of plants by regulating amino acid  
45 metabolism (Casteel et al., 2014; Zhou, Lou, Tzin, & Jander, 2015), which can alter the feeding  
46 behavior and nutrient uptake by subsequent herbivores (Behmer, 2009; Zhu, Poelman, & Dicke,  
47 2014). For example, the composition of free amino acids constitutively changes in leaves of  
48 soybean plants in response to soybean aphids (Chiozza, O’Neal, & MacIntosh, 2010). *Tomato*  
49 *yellow leaf curl virus* also alters the nutritional quality of tomato plants by affecting free amino  
50 acid levels in phloem, which alters the amino acid composition of whitefly (*Bemisia tabaci*)  
51 honeydew (Guo et al., 2019). However, few studies have explored how the diversity and identity  
52 of attacking organisms, and variation in the order of attack, affect nutritional traits of plants.

53           While there has been considerable research on the jasmonic and salicylic acid pathways, to  
54 understand complexities involved in plant defense it is necessary to assess how biotic antagonists  
55 mediate other signaling pathways (e.g., Lacerda, Vasconcelos, Pelegrini, & Grossi de Sa, 2014;  
56 Suzuki, 2016). Moreover, it is critical to explore how changes in plant defense are correlated to  
57 plant nutrients. For example, plants in low-nitrogen soil often adopt carbon-based defenses, while  
58 plants grown with fertilizer often accumulate nitrogenous toxins (Cipollini, Walters, & Voelckel,  
59 2017). Nitrogen in plants may also affect both pathogens and herbivores through synthesis of  
60 defensive metabolite, nitric oxide, and through nitrogen mobilization (War et al., 2012; Mur,  
61 Simpson, Kumari, Gupta, & Gupta, 2017). However, few studies have correlated effects of  
62 multiple biotic stressors on both plant chemical signaling and nutritional properties (Petek et al.,  
63 2014; Su et al., 2016).

64           We addressed these knowledge gaps by assessing the response of *Pisum sativum* plants to  
65 attack from a piercing-sucking vector herbivore, the pea aphid (*Acrythosiphon pisum*), a chewing  
66 non-vector herbivore, the pea leaf weevil (*Sitona lineatus*), and an aphid-borne pathogen, *Pea-*  
67 *enation mosaic virus* (PEMV). These organisms co-occur in ecosystems of eastern Washington  
68 and northern Idaho, USA, and interactions between them can affect plant traits and signaling  
69 pathways affecting insects and pathogens (Chisholm, Eigenbrode, Clark, Basu, & Crowder, 2019;  
70 Bera, Blundell, Liang, Crowder, & Casteel, 2020). However, the order in which herbivores and  
71 pathogens arrive on hosts, which varies across sites (Chisholm et al., 2019), may impact plant traits  
72 and defenses. To address this, we varied the diversity, identity, and order of attack among this  
73 community of biotic antagonists and assessed resulting changes in gene expression and  
74 phytohormones related to plant defense and nutrition. Our study revealed how plant responses to  
75 diverse stressors can mediate complex species interactions within a pathosystem.

76

## 77 **2 MATERIALS AND METHODS**

### 78 2.1 Study system

79 The Palouse region of eastern Washington and northern Idaho, USA, is home to many legumes  
80 including *P. sativum* (Black et al., 1998). In *P. sativum* fields, *S. lineatus*, a chewing herbivore,  
81 co-occurs with *A. pisum*, a phloem-feeding herbivore that can transmit pathogens such as PEMV  
82 (Chisholm et al., 2019). PEMV is one of several viruses that infects *P. sativum*, and this pathogen  
83 is obligately transmitted by aphids in a persistent manner (Chisholm et al., 2019).

84 *Sitona lineatus* adults overwinter outside of *P. sativum* fields and migrate into fields in late  
85 spring before *A. pisum* arrive (Cárcamo et al., 2018). After *S. lineatus* eggs hatch, larvae burrow  
86 into the soil to feed and pupate before emerging as adults in the summer (Cárcamo et al., 2018);  
87 these second-generation adults often occur on plants under attack from *A. pisum* and PEMV  
88 (Chisholm et al., 2019). Thus, *S. lineatus* attacks plants in the field both before and after *A. pisum*  
89 and PEMV. However, it is unknown if responses of *P. sativum* differ based on the number of  
90 stressors, and their order of attack. Moreover, molecular mechanisms that mediate interactions  
91 among these stressors are largely unknown (Chisholm et al., 2019; Bera et al., 2020).

92 To address these questions, we conducted greenhouse assays to assess interactions between  
93 *S. lineatus*, *A. pisum*, and PEMV on *P. sativum* plants, and molecular mechanisms affecting these  
94 interactions. First-generation adult *S. lineatus* for experiments were collected from commercial *P.*  
95 *sativum* fields, or wild patches of *Vicia villosa*, immediately prior to experiments. Colonies of  
96 infectious *A. pisum* with PEMV, and uninfected *A. pisum*, were started from Palouse field-  
97 collected individuals (Chisholm et al., 2019) and were maintained on *P. sativum* plants in a  
98 greenhouse (21-24°C during day cycle, 16-18°C during dark cycle, 16:8 h light:dark).

99

## 100 2.2 Experimental design

101 We conducted a  $3 \times 2$  greenhouse (21-24°C day cycle, 16-18°C dark cycle, 16:8 h light:dark)  
102 experiment that varied *S. lineatus*, *A. pisum*, and PEMV (Fig. 1). There were three *S. lineatus*  
103 treatments: (i) control: no adults prior to *A. pisum* treatments (none), (ii) two adults that fed for 48  
104 h prior to *A. pisum* treatments (first), and (iii) two adults that fed for 48 h after *A. pisum* treatments  
105 (second). The two *A. pisum* treatments were: (i) sham: 10 5-d old uninfected adults that fed for  
106 48 h and (ii) PEMV: 10 5-d old PEMV-infectious adults that fed for 48 h. For treatments with *S.*  
107 *lineatus* first, they were removed by hand prior to *A. pisum* treatments; for treatments with *A. pisum*  
108 first, they were removed by aspirator prior to *S. lineatus* treatments. Treatments were conducted  
109 on individual *P. sativum* plants in mesh ‘bug dorms’ (0.6 × 0.6 × 0.6 m), with six replicates  
110 randomly assigned to each treatment in a factorial design (3 *S. lineatus* treatments × 2 *A. pisum*  
111 treatments). After insects were removed, plants were allowed to develop for 7 d before we  
112 harvested tissue to assess viral titer, gene expression, and nutrients. Tissue samples from the whole  
113 aboveground portion plants were collected and flash frozen in liquid nitrogen and stored in a -  
114 80°C freezer until processing. Viral titer samples confirmed that 100% of plants in the PEMV  
115 treatments became infected over the course of the experiment.

116

## 117 2.3 Analysis of plant defense and biosynthetic genes

118 Plant tissue was processed using liquid nitrogen in sterilized mortars and pestles. Powdered tissue  
119 samples (50 to 100 mg) were used for RNA extraction with Promega SV total RNA isolation kits  
120 (Promega, Madison, WI). The quantity and quality of RNA was estimated on a NanoDrop1000  
121 and agarose gel electrophoresis, respectively and 1 µg of total RNA from each sample was used

122 for cDNA synthesis (Bio-Rad iScript cDNA Synthesis kits). Gene specific primers (Table S3) for  
123 qRT-PCR were designed using the IDT Primer Quest Tool. Each qRT-PCR reaction (10  $\mu$ l) was  
124 set up containing 3  $\mu$ l of ddH<sub>2</sub>O, 5  $\mu$ l of iTaq Univer SYBR Green Supermix (Bio-Rad), 1  $\mu$ l of  
125 specific primer mix (forward and reverse [concentration 10 $\mu$ M]), and 1  $\mu$ l of diluted (1: 25) cDNA  
126 template. Reactions were set up in triplicates for each sample and ran on a CFX96 qRT-PCR  
127 machine (Biorad). The qRT-PCR program included an initial denaturation for 3 min at 95°C,  
128 followed by 40 denaturation cycles for 15 s at 95°C, annealing for 30 s at 60°C, and extension for  
129 30 s at 72°C. For melting curve analysis, a dissociation step cycle (55°C for 10 s and then 0.5°C  
130 for 10 s until 95°C) was added. The comparative  $2^{-\Delta\Delta C_t}$  method (Livak & Schmittgen, 2001;  
131 Kozera & Rapacz, 2013) was used to calculate the relative expression level of each gene, with  $\beta$ -  
132 tubulin as an endogenous control.

133 We assessed expression of seven genes associated with defense in peas. Gene sequences  
134 were obtained using accession numbers (available genes) or using Pea Marker Database (Kulaeva  
135 et al., 2017) and blast searching through the reference genome (Kreplak et al., 2019). Four genes  
136 were associated with plant hormone biosynthesis: (i) *Isochorismate synthase1 (ICS1)* (salicylic  
137 acid), (ii) *Lipoxygenase 2 (LOX2)* (jasmonic acid), (iii) *Aldehyde oxidase 3 (AO3)* (abscisic acid),  
138 and (iv) *Gibberellin 2-oxidase (GA2ox)* (gibberellic acid). *ICS1* converts chorismate to  
139 isochorismate, a precursor of salicylic acid biosynthesis (Seguel et al., 2018), while *LOX2* is a  
140 precursor to jasmonic acid biosynthesis (Wasternack & Hause, 2013). *AO3* catalyzes abscisic acid  
141 biosynthesis by oxidizing abscisic aldehyde, and *GA2OX* catalyzes bioactive giberrellic acids or  
142 their immediate precursors to inactive forms (Zdunek-Zastocka & Sobczak, 2013; Serova,  
143 Tsyganova, Tikhonovich, & Tsyganov, 2019; He et al., 2019). All of these gene transcripts can  
144 affect plant defense and plant-microbe interactions (Lee et al., 2012; Yergaliyev et al., 2016).

145 The three additional genes examined were associated with defense response transcripts that  
146 occur downstream from hormone induction. One of these genes, *Pathogenesis-related protein 1*  
147 (*PR1*) affects systemic acquired resistance-mediated defense signaling and occurs downstream in  
148 the salicylic acid pathway (Fondevilla, Küster, Krajinski, Cubero, & Rubiales, 2011; Miranda et  
149 al., 2017). The second defense response transcript was an antimicrobial defensin peptide called  
150 *Disease resistance response gene (DRR230)*, which has been reported to provide resistance in peas  
151 against various pathogens (Lacerda et al., 2014; Selim, Sanssené, Rossard, & Courtois, 2017). The  
152 third defense response transcript assessed was *Lectin (PsLectin)*. Plant lectins are a group of  
153 carbohydrate binding proteins, and *Lectin* genes can be induced by salicylic acid, jasmonic acid,  
154 and herbivores to stimulate phytoalexin and pistatin production in peas (Fondevilla et al., 2011;  
155 Armijo et al., 2013; Macedo, Oliveira, & Oliveira, 2015).

156

#### 157 2.4 Measurement of plant phytohormones

158 Plant tissue samples were assessed for three phytohormones: jasmonic acid, salicylic acid, and  
159 abscisic acid following procedures of Patton, Bak, Sayre, Heck, & Casteel (2019). Briefly, tissue  
160 samples were first flash frozen in liquid nitrogen before being lyophilized and weighed. Hormones  
161 were extracted in iso-propanol:H<sub>2</sub>O:HCL<sub>1MOL</sub> (2:1:0.005) with 100 µl of internal standard solution  
162 (1000 pg of each). Samples were evaporated to dryness, resuspended in 100 µl of MeOH, filtered,  
163 and 10 µl of each sample was injected into an Agilent Technologies 6420 triple quad liquid  
164 chromatography-tandem mass spectrometry instrument (Agilent, Santa Clara, CA). A Zorbax  
165 Extend-C18 column 3.0 × 150mm (Agilent, Santa Clara, CA) was used with 0.1% formic acid in  
166 water (A) and 0.1% (v/v) formic acid in acetonitrile (B) at a flow rate of 600 mL min<sup>-1</sup>. The  
167 gradient used was 0–1 min, 20% B; 1–10 min, linear gradient to 100% B; 10-13 min, 100% A.



168 Retention times were: jasmonic acid (D5) standard (5.740 min), jasmonic acid (5.744 min),  
169 salicylic acid D4 standard (4.677 min), salicylic acid (4.720 min).

170

## 171 2.5 Analysis of plant nutritional components

172 For amino acid analysis, leaf tissue was lyophilized, weighed, and extracted with 20mM of HCL  
173 (Patton et al., 2019). Derivation was done using AccQTag reagents following the manufacturer's  
174 instructions (Waters, Shinagawa-ku, Tokyo), and derivatised samples (10  $\mu$ l) were then injected.  
175 Ground tissue was extracted with 100  $\mu$ l of 20 mM HCl, centrifuged, and the supernatant was  
176 saved. Amino acids were derivatized using AccQ-Fluor reagent kits (Waters, Milford, MA), with  
177 L-Norleucine as an internal standard. 10  $\mu$ l from each sample were injected with an Agilent 1260  
178 Infinity pump with a Nova-Pak C18 column and fluorescence detector, and Agilent Chemstation  
179 software for data recording. Amino acid derivatives were detected with an excitation wavelength  
180 of 250 nm and an emission wavelength of 395 nm. Peak areas were compared to a standard curve  
181 made from a serial dilution of amino acid standards (Sigma-Aldrich, St. Louis, MO). injected into  
182 a Agilent 1260 Infinity HPLC (Agilent, Santa Clara, CA) with a Nova-Pak C18 column (Casteel  
183 et al., 2014). Solvent A, AccQ-Tag Eluent A, was premixed from Waters; Solvent B was  
184 acetonitrile:water (60:40). The gradient used was 0–0.01 min, 100% A; 0.01–0.5 min, linear  
185 gradient to 3% B; 0.5–12 min, linear gradient to 5% B; 12–15 min, linear gradient to 8% B; 15–  
186 45 min, 35% B; 45–49 min, linear gradient to 35% B; 50–60 min, 100% B. The flow rate was  
187 1.0 ml min<sup>-1</sup>. Amino acid derivatives were measured with an Agilent fluorescence detector with  
188 an excitation wavelength of 250 nm and an emission wavelength of 395 nm. For concentration  
189 calculations, standard curves were generated for each amino acid using dilutions of the standard.

190

## 191 2.6 Data analysis

192 To evaluate effects of our treatments on host-plant defenses and host-plant quality, we ran a  
193 series of multivariate models using R ver. 3.5.2 (R Working Group, 2018). First, gene expression  
194 was evaluated with *ICSI*, *LOX2*, *GA2ox*, *AO3*, *PRI*, *DRR230*, and *PsLectin* as the responses, with  
195 MANOVA to assess treatment effects on relative gene expression ( $2^{-\Delta\Delta Ct}$ ) based on cycle threshold  
196 values for each observed gene transcript. Estimated marginal mean of Ct values, and standard error  
197 of the mean, were generated using the emmeans package in R (Lenth, 2016). The methodology for  
198  $2^{-\Delta\Delta Ct}$  followed modified recommendations from Rao, Huang, Zhou, & Lin (2013) and Kozera &  
199 Rapacz (2013), using housekeeping gene  *$\beta$ -tubulin* to normalize expression and a sham aphid (non-  
200 infective Pea aphid and no weevil addition) treatment as a control.

201 Hormone levels in plants were evaluated using MANOVA, with salicylic acid, jasmonic  
202 acid, and abscisic acid as responses (3 variables). Total amino acid content was evaluated using a  
203 generalized linear model (GLM) with total concentration among all amino acids as the response.  
204 All models assessed treatment effects, using *S. lineatus* addition, *A. pisum* infection status, and  
205 their interaction as predictors. Finally, changes in the amino acid profile was evaluated using non-  
206 metric multidimensional scaling (NMDS) with the vegan package (Oksanen et al., 2019) following  
207 Ceulemans, Hulsmans, Ende, & Honnay (2017).

208

## 209 **3 RESULTS**

### 210 3.1 Effects of multiple antagonists and attack order on plant gene transcripts

211 Transcription of plant genes associated with hormone biosynthesis across four pathways: (i)  
212 salicylic acid (*ICSI*), (ii) jasmonic acid (*LOX2*), (iii) abscisic acid (*AO3*), and (iv) gibberellic acid  
213 (*GA2ox*), were induced by PEMV when *S. lineatus* was not present (Fig. 2A-D, Table S1).

214 However, the transcription of each biosynthesis gene was not differentially expressed between  
215 PEMV-infected and uninfected plants when *S. lineatus* was present, regardless of whether *S.*  
216 *lineatus* individuals attacked plants before or after PEMV (Table S1, A x W interaction, *Pillai* =  
217 116.3, *P* = 0.15, Fig. 2). Similarly, in the absence of PEMV, *S. lineatus* induced transcription of  
218 three genes (*LOX2*, *AO3*, *GA2ox*), whereas in the presence of PEMV (irrespective of attack order),  
219 these transcripts were equally expressed in plants with or without *S. lineatus* (Fig. 2B-D, Table  
220 S1). This shows that *S. lineatus* attacks did not suppress transcript levels in virus-infected plants  
221 but did increase transcript levels in the absence of PEMV, while PEMV inhibited the transcription  
222 of biosynthesis genes induced by *S. lineatus*, with any attack order (Fig. 2).

223 All three defense response transcripts (*PR1*, *DDR230*, *PsLectin*) were induced by PEMV  
224 when *S. lineatus* was not present (Fig. 3); similarly, each transcript was induced by *S. lineatus*  
225 when PEMV was not present except for *Lectin* (Fig. 3, Table S1; A × W interaction, *F* = 4.13, *P*  
226 = 0.035). When *S. lineatus* attacked first, the expression level of *Lectin* did not change between  
227 sham and infective aphid treatments. Similarly, the expression level of *PsLectin* did not change if  
228 *S. lineatus* attacked second (Fig. 3). The effects of PEMV on the transcripts, however, depended  
229 on the presence of *S. lineatus* and attack order. While *DDR230* was induced by PEMV (Table S1,  
230 *F* = 12.28, *P* = 0.002), this effect was diminished when *S. lineatus* was present after PEMV (Fig.  
231 3B). In contrast, effects of PEMV on *PR1* were inhibited only when *S. lineatus* attacked second  
232 (Fig. 3A), whereas that the induction of lectin by PEMV was not altered by the presence of weevils  
233 in either order (Fig. 3C). However, effects of *S. lineatus* on plant defense response transcripts were  
234 inhibited by PEMV with any order (Fig. 3A-C). Unlike the strong effects of PEMV and *S. lineatus*,  
235 uninfected “sham” *A. pisum* had the lowest expression (Figs. 2, 3).

236

### 237 3.2 Effects of multiple antagonists and attack order on plant phytohormones

238 We also observed variation in phytohormones in response to *A. pisum* (Table S2, *Pillai* = 0.95, *P*  
239 < 0.001) and *S. lineatus* (Table S2, *Pillai* = 1.195, *P* < 0.001). Infectious aphids with the PEMV  
240 pathogen strongly induced salicylic acid (Table S2, *F* = 254.2, *P* < 0.001), but this was inhibited  
241 when *S. lineatus* attacked after PEMV (Fig. 4A, Tukey HSD). PEMV did not affect jasmonic acid  
242 (Table S2, *F* = 0.97, *P* = 0.34), but the order of *S. lineatus* did (Table S2, *F* = 5.30, *P* = 0.018).  
243 Both *S. lineatus* (Table S2, *F* = 4.10, *P* = 0.037) and infectious *A. pisum* induced abscisic acid  
244 (Table S2, *F* = 9.96, *P* = 0.006) and this effect was contingent on the attack order (Table S2, *A* ×  
245 *W*, *F* = 4.32, *P* = 0.032, Fig. 4, Tukey HSD). Jasmonic acid levels were suppressed by *S. lineatus*  
246 when attacking prior to non-infectious sham *A. pisum*, but not on plants already attacked by PEMV  
247 (Fig. 4B, Tukey HSD).

248

### 249 3.3 Effects of multiple antagonists and attack order on plant nutrients

250 Feeding by *S. lineatus* increased the total amino acid levels (GLM,  $\chi^2 = 9.19$ , *P* = 0.01, Fig 5), but  
251 PEMV-infectious *A. pisum* did not (GLM,  $\chi^2 = 0.0437$ , *P* = 0.834), and this effect was not  
252 modified depending on attack order (GLM, *A* × *W* interaction,  $\chi^2 = 0.237$ , *P* = 0.625). Non-metric  
253 multidimensional scaling (NMDS) analysis of amino acid composition also showed that changes  
254 to amino acid availability was most different among treatments for alanine, arginine, lysine, and  
255 glycine (Ordination plot, Fig S1).

256

## 257 5 DISCUSSION

258 Assessing interactions between biotic stressors and plants in food webs is critical to understand  
259 the dynamics of these interactions. Plant responses to stressors are often specific to the attacker,

260 and both phytochemical responses and plant nutritional status can affect susceptibility to specific  
261 stressors (van Geem, Gols, Raaijmakers, & Harvey, 2016; Shikano, 2017). We show plants  
262 responded in complex ways to unique biotic stressors, including a piercing-sucking herbivore (*A.*  
263 *pisum*), a chewing herbivore (*S. lineatus*), and a virus (PEMV). Our study is among the first to  
264 assess how the order of attack, and diversity of stressors, mediate the defensive responses of plants  
265 and plant nutritional status (see also Vos, Moritz, Pieterse, & Van Wees, 2015). Our results show  
266 that plants traits varied in response to the type of attacker, the number of stressors, and their order  
267 of arrival. Moreover, we show that assessment of multiple gene transcripts, phytohormones, and  
268 plant nutrients provides a more comprehensive perspective on mechanisms driving plant-insect-  
269 pathogen interactions than any isolated response.

270 We found PEMV caused broad defensive responses in *P. sativum* by inducing specific gene  
271 transcripts and phytohormones (Figs. 2, 3 & 4). Biotropic pathogens such as PEMV are known to  
272 activate salicylic acid signaling (Singh, Swain, Singh, & Nandi, 2018; Chisholm, Sertsuvalkul,  
273 Casteel, & Crowder, 2018). This was reflected by increased expression of the *ICS1* biosynthesis  
274 gene, increased salicylic acid hormone levels, and increased expression of the downstream  
275 defensive transcript *PRI* when PEMV was present. However, effects of PEMV were not limited  
276 to salicylic acid, as PEMV induced gene transcripts often associated with biosynthesis of jasmonic  
277 acid (*LOX2*), abscisic acid (*AO3*), and gibberellic acid (*GA2ox*), while also affecting defense  
278 response genes that occur downstream from induction of these hormones (*DRR230*, *PsLectin*).  
279 Similar results in *P. sativum* have been observed in response to fungal infection by *Mycosphaerella*  
280 *pinodes* and *Phoma koolunga*, where infections induce defense related genes across multiple  
281 signaling pathways (Fondevilla et al., 2011; Tran, You, & Barbetti, 2018). However, increased  
282 expression of *LOX2* and *AO3* gene transcripts (Fig. 2) were not reflected by increased levels of

283 jasmonic acid or abscisic acid (Fig. 4). This suggests that measuring phytohormones, or gene  
284 transcripts, in isolation may fail to reveal more complex pathways by which plants respond to  
285 stress (Kazan & Lyons, 2014).

286 While PEMV had broad effects on plants, *S. lineatus* mediated these responses. When *S.*  
287 *lineatus* was present, before or after PEMV, the expression of each of the four biosynthesis gene  
288 transcripts induced by PEMV alone were not significantly different when comparing PEMV and  
289 “sham” *A. pisum* treatments (Fig. 2). These effects may be due to *S. lineatus* inducing expression  
290 of these transcripts in “sham” *A. pisum* treatments, except for *ICS1* (Fig. 2). However, effects of  
291 PEMV on plant defense genes that occurred downstream of hormone induction (*PR1*, *DDR230*,  
292 *PsLectin*) were also impacted by *S. lineatus*, but these effects depended on attack order. This  
293 suggests that the order in which antagonists attacked plants had stronger effects on plant defense  
294 gene transcripts than on hormone biosynthesis gene transcripts. Similarly, while *S. lineatus*  
295 increased expression of three of the biosynthesis gene transcripts studied when PEMV was not  
296 present, expression of these was not different when PEMV was present (Fig. 2), and PEMV  
297 similarly caused decreased expression of two genes (*PR1*, *DDR230*) that were induced when *S.*  
298 *lineatus* was present alone (Fig. 2). For plants attacked first by either PEMV or *S. lineatus*, we  
299 observed the strongest evidence for mutual antagonism at the gene transcript level rather than for  
300 phytohormones (Figs. 2-4). This is in line with studies showing strong “mutual antagonism”  
301 between chewing herbivores and biotrophic pathogens (Thaler, Agrawal, & Halitschke, 2010; Vos  
302 et al., 2015), although the order of attack led to variation in this antagonism.

303 Our results provide evidence that the order of arrival of biotic stressors on plants can play a  
304 crucial role in determining plants’ response to these attackers. While mutual antagonism between  
305 *S. lineatus* and PEMV was common, for some genes these effects only occurred when *S. lineatus*

306 attacked first, and for others when *S. lineatus* attacked second (Figs. 2-4). Mutual antagonism has  
307 most often been studied as effects of a prior attacker affecting a subsequent attacker, such as when  
308 a herbivore alters gene activation or phytohormones in ways that attenuate performance of  
309 subsequent attackers (Kessler & Halitschke, 2007; Erb, Robert, Hibbard, & Turlings, 2011; Stam,  
310 Mantelin, McLellan, & Thilliez, 2014; Huang et al., 2017). However, our results suggest that a  
311 second attacker may also mitigate defensive responses against the first attacker in ways that might  
312 affect plant defense and propagation of pathogens. For example, we show that plants infected by  
313 PEMV had decreased defenses when subsequently attacked by *S. lineatus* (Fig. 3), which should  
314 promote PEMV replication. Moreover, our results suggest that, PEMV infection induces pathogen  
315 defense and *S. lineatus* inhibits that if they appear on plants after the infection has been established.  
316 This may be more strongly expressed as variation in gene transcripts rather than hormone levels,  
317 a result that has similarly been seen in *Arabidopsis* in response to pathogen infection (Anderson et  
318 al., 2004).

319 Mutual antagonism in plant signaling pathways has most commonly been examined in regard  
320 to tradeoffs between jasmonic acid and salicylic acid. Our results show these tradeoffs extend to  
321 other signaling pathways. For example, jasmonic acid exhibits antagonism with abscisic acid in  
322 *Arabidopsis* following attack from *Fusarium oxysporum* (Anderson et al., 2004). Mutual  
323 antagonism between jasmonic acid and gibberellic acid, and jasmonic acid and abscisic acid, have  
324 also been reported (Yang, Yang, & He, 2013; Okada et al., 2015; Liu & Hou, 2018). For example,  
325 jasmonic acid facilitates defense over growth by repressing degradation of DELLA protein in rice  
326 and *Arabidopsis*, but elevated DELLA proteins interfere with the gibberellic acid pathway by  
327 binding to growth promoting transcription factors associated with gibberellic acid signaling (Yang  
328 et al., 2012, 2013; Okada et al., 2015). Antagonistic relationships between gibberellic acid and

329 abscisic acid have also been reported in both mono and dicot plants and regulated by various  
330 transcription factor regulators in response to diverse environmental cues (Liu & Hou, 2018).  
331 However, antagonisms between salicylic acid and abscisic acid may actually lead to synergism  
332 between jasmonic acid and abscisic acid, where elevated abscisic acid levels following infection  
333 with *Pseudomonas syringae* induce jasmonic acid in *Arabidopsis*, which in turn limits the levels  
334 of salicylic acid (Fan, Hill, Crooks, Doerner, & Lamb, 2009). Overall, these results suggest that a  
335 broad examination of genes and hormones are needed to elucidate pathways underlying plant-  
336 insect-pathogen interactions in *P. sativum* and other plants.

337 Our results suggest mutual antagonism may also occur among defense gene transcripts that  
338 are associated with a single signaling pathway. For example, the induction of *PRI*, a salicylic acid-  
339 responsive gene, was mitigated by *S. lineatus*, as may be expected with antagonism between  
340 jasmonic acid and salicylic acid. However, the expression of *ICS1*, another gene associated with  
341 the biosynthesis of salicylic acid, was not responsive to *S. lineatus*. This has been seen in other  
342 studies where *ICS1* was not induced by caterpillar feeding although other genes associated with  
343 salicylic acid were (Onkokesung, Reichelt, van Doorn, Schuurink, & Dicke 2016). These results  
344 suggest that a plant's response to multiple stressors is unlikely to result from simple crosstalk but  
345 rather from interactions among multiple signaling pathways that may exhibit complex responses.

346 In addition to affecting plant gene expression and phytohormones, plant pathogens such as  
347 viruses can also alter nutritional quality of their host plants in ways that affect vectors (Mauck,  
348 Bosque-Pérez, Eigenbrode, Moraes, & Mescher, 2012; Wang, Senthil-Kumar, Ryu, Kang, &  
349 Mysore, 2012; Patton et al., 2019). Similarly, non-vector herbivores may strongly affect the  
350 quantity and quality of plant nutrients (Ángeles-López, Rivera-Bustamante, & Heil, 2016). For  
351 example, *pepper golden mosaic virus* (PGMV) infection in *Capsicum annuum* increased levels of



352 the amino acids proline, tyrosine, valine but decreased levels of histidine and alanine. In the same  
353 system, the greenhouse whitefly, *Trialeurodes vaporariorum*, reversed the levels of these amino  
354 acids (Ángeles-López et al., 2016). Similarly, we show that PEMV improved the nutritional status  
355 of peas by increasing total amino acid content, but these effects were mediated by the presence  
356 and order of arrival of *S. lineatus*. Arrival of *S. lineatus* before PEMV infection suppressed the  
357 amount of total amino acids in peas, while enhanced amino acid level was detected if *S. lineatus*  
358 damaged peas after PEMV infected was established. This suggests the intriguing possibility that  
359 antagonism between a pathogen and non-vector herbivore can occur at the level of amino acid  
360 production in plants.

361 Overall, our study provides example of complex antagonistic interaction between a plant  
362 pathogen and a herbivore that was manifest as changes in plant gene transcripts, phytohormones  
363 levels, and plant nutrients. However, we show that assessing the order of attack is necessary to  
364 best understand the complexity and mechanisms of plant-insect-pathogen interactions. Moreover,  
365 our study suggests compete pathways must be characterized as differences are evident even when  
366 a few transcripts and metabolites are analyzed., often measured with associated gene transcripts  
367 (Bedini, Mercy, Schneider, Franken, & Lucic-Mercy, 2018; Ángeles-López et al., 2016; Shi et al.,  
368 2019), may fail to capture mechanisms by which plants interact with multiple stressors. Our results  
369 demonstrate both the order of arrival, and the diversity of interactions, determine plant responses  
370 to stress through the combined action of defense gene activation, phytohormone accumulation,  
371 and modification of plant nutrients. Characterizing the pathways by which plants respond to single  
372 and multiple stressors, with varying attack order, can shed light on the mechanisms that shape food  
373 web interactions among plants, herbivores, and pathogens.

374

375 **ACKNOWLEDGEMENTS**

376 We thank the many undergraduates who helped in various experiments, data collection, and O.  
377 Hill for assistance with data analysis. This research was supported by USDA-NIFA Grants 2016-  
378 67011-24693, 2017-67013-26537, and Hatch project 1014754.

379

380 **AUTHOR CONTRIBUTIONS**

381 S.B. and D.W.C. conceived the ideas and designed the methodology; S.B., R.E.C., S.B. and  
382 C.L.C. collected the data; R.E.C., S.B., C.L.C and D.W.C. analyzed the data; all authors  
383 contributed critically to the drafts and gave final approval for publication.

384

385 **CONFLICT OF INTERESTS**

386 The authors declare no conflict of interests.

387

388 **REFERENCES**

- 389 Anderson, J. P., Badruzaufari, E., Schenk, P. M., Manners, J. M., Desmond, O. J., Ehlert, C., ...  
390 Kazan, K. (2004). Antagonistic interaction between abscisic acid and jasmonate-ethylene  
391 signaling pathways modulates defense gene expression and disease resistance in  
392 *Arabidopsis*. *The Plant Cell*, 16(12), 3460–3479. doi: [10.1105/tpc.104.025833](https://doi.org/10.1105/tpc.104.025833)
- 393 Ángeles-López, Y. I., Rivera-Bustamante, R. F., & Heil, M. (2016). Colonization by phloem-  
394 feeding herbivore overrides effects of plant virus on amino acid composition in phloem of  
395 chili plants. *Journal of Chemical Ecology*, 42(10), 985–988. doi: [10.1007/s10886-016-0747-](https://doi.org/10.1007/s10886-016-0747-2)  
396 [2](https://doi.org/10.1007/s10886-016-0747-2)
- 397 Armijo, G., Salinas, P., Monteoliva, M. I., Seguel, A., García, C., Villarroel-Candia, E., ...  
398 Holuigue, L. (2013). A salicylic acid-induced lectin-like protein plays a positive role in the  
399 effector-triggered immunity response of *Arabidopsis thaliana* to *Pseudomonas syringae*  
400 *Avr-Rpm1*. *Molecular Plant-Microbe Interactions: MPMI*, 26(12), 1395–1406. doi:  
401 [10.1094/MPMI-02-13-0044-R](https://doi.org/10.1094/MPMI-02-13-0044-R)
- 402 Bedini, A., Mercy, L., Schneider, C., Franken, P., & Lucic-Mercy, E. (2018). Unraveling the initial  
403 plant hormone signaling, metabolic mechanisms and plant defense triggering the  
404 endomycorrhizal symbiosis behavior. *Frontiers in Plant Science*, 9. doi:  
405 [10.3389/fpls.2018.01800](https://doi.org/10.3389/fpls.2018.01800)
- 406 Behmer, S. T. (2009). Insect herbivore nutrient regulation. *Annual Review of Entomology*, 54(1),  
407 165–187. doi: [10.1146/annurev.ento.54.110807.090537](https://doi.org/10.1146/annurev.ento.54.110807.090537)
- 408 Bera, S., Blundell, R., Liang, D., Crowder, D. W., & Casteel, C. L. (2020). The oxylipin signaling  
409 pathway is required for increased aphid attraction and retention on virus-infected plants.  
410 *Journal of Chemical Ecology*. doi: [10.1007/s10886-020-01157-7](https://doi.org/10.1007/s10886-020-01157-7)

- 411 Black, A. E., Strand, E., Wright, R. G., Scott, J. M., Morgan, P., & Watson, C. (1998). Land use  
412 history at multiple scales: implications for conservation planning. *Landscape and Urban*  
413 *Planning*, 43(1), 49–63. doi: [10.1016/S0169-2046\(98\)00096-6](https://doi.org/10.1016/S0169-2046(98)00096-6)
- 414 Cárcamo, H. A., Vankosky, M. A., Olfert, O. O., Wijerathna, A., Evenden, M. L., & Meers, S.B.  
415 (2018). Progress toward integrated pest management of pea leaf weevil: a review. *Annals of*  
416 *the Entomological Society of America*, 111(4), 144–153. (doi:10.1093/aesa/say007)
- 417 Casteel, C. L., Yang, C., Nanduri, A. C., De Jong, H. N., Whitham, S. A., & Jander G. (2014). The  
418 NIa-Pro protein of *Turnip mosaic virus* improves growth and reproduction of the aphid  
419 vector, *Myzus persicae* (green peach aphid). *Plant Journal*, 77, 653–663. doi:  
420 [10.1111/tpj.12417](https://doi.org/10.1111/tpj.12417)
- 421 Ceulemans, T., E. Hulsmans, W. V. Ende, & O. Honnay. (2017). Nutrient enrichment is associated  
422 with altered nectar and pollen chemical composition in *Succisa pratensis* (Moench) and  
423 increased larval mortality of its pollinator *Bombus terrestris* L. *PLOS ONE* 12(4), e0175160.  
424 doi: [10.1371/journal.pone.0175160](https://doi.org/10.1371/journal.pone.0175160)
- 425 Chiozza, M. V., O’Neal, M. E., & MacIntosh, G. C. (2010). Constitutive and induced differential  
426 accumulation of amino acid in leaves of susceptible and resistant soybean plants in response  
427 to the soybean aphid (Hemiptera: Aphididae). *Environmental Entomology*, 39(3), 856–864.  
428 doi: [10.1603/EN09338](https://doi.org/10.1603/EN09338)
- 429 Chisholm, P. J., Eigenbrode, S. D., Clark, R. E., Basu, S., & Crowder, D. W. (2019). Plant-  
430 mediated interactions between a vector and a non-vector herbivore promote the spread of a  
431 plant virus. *Proceedings of the Royal Society B: Biological Sciences*, 286(1911), 20191383.  
432 doi: [10.1098/rspb.2019.1383](https://doi.org/10.1098/rspb.2019.1383)

- 433 Chisholm, P. J., Sertsuvalkul, N., Casteel, C. L., & Crowder, D. W. (2018). Reciprocal plant-  
434 mediated interactions between a virus and a non-vector herbivore. *Ecology*, *99*(10), 2139–  
435 2144. doi: [10.1002/ecy.2449](https://doi.org/10.1002/ecy.2449)
- 436 Cipollini, D., Walters, D., & Voelckel, C. (2017). Costs of resistance in plants: from theory to  
437 evidence. In *Annual Plant Reviews online* (pp. 263–307). doi:  
438 [10.1002/9781119312994.apr0512](https://doi.org/10.1002/9781119312994.apr0512)
- 439 Erb, M., Robert, C. A. M., Hibbard, B. E., & Turlings, T. C. J. (2011). Sequence of arrival  
440 determines plant-mediated interactions between herbivores. *Journal of Ecology*, *99*(1), 7–  
441 15. doi: [10.1111/j.1365-2745.2010.01757.x](https://doi.org/10.1111/j.1365-2745.2010.01757.x)
- 442 Fan, J., Hill, L., Crooks, C., Doerner, P., & Lamb, C. (2009). Abscisic acid has a key role in  
443 modulating diverse plant-pathogen interactions. *Plant Physiology*, *150*(4), 1750–1761. doi:  
444 [10.1104/pp.109.137943](https://doi.org/10.1104/pp.109.137943)
- 445 Fondevilla, S., Küster, H., Krajinski, F., Cubero, J. I., & Rubiales, D. (2011). Identification of  
446 genes differentially expressed in a resistant reaction to *Mycosphaerella pinodes* in pea using  
447 microarray technology. *BMC Genomics*, *12*, 28. doi: [10.1186/1471-2164-12-28](https://doi.org/10.1186/1471-2164-12-28)
- 448 Guo, L., Su, Q., Yin, J., Yang, Z., Xie, W., Wang, S., ... Zhang, Y. (2019). Amino acid utilization  
449 may explain why *Bemisia tabaci* Q and B differ in their performance on plants infected by  
450 the *Tomato yellow leaf curl virus*. *Frontiers in Physiology*, *10*. doi:  
451 [10.3389/fphys.2019.00489](https://doi.org/10.3389/fphys.2019.00489)
- 452 He, H., Liang, G., Lu, S., Wang, P., Liu, T., Ma, Z., Zuo, C., Sun, X., Chen, B., & Mao, J. (2019).  
453 Genome-wide identification and expression analysis of GA2ox, GA3ox, and GA20ox are  
454 related to gibberellin oxidase genes in grape (*Vitis Vinifera* L.). *Genes*, *10*(9), 680.  
455 <https://doi.org/10.3390/genes10090680>

- 456 Huang, W., Robert, C. A. M., Hervé, M. R., Hu, L., Bont, Z., & Erb, M. (2017). A mechanism for  
457 sequence specificity in plant-mediated interactions between herbivores. *New Phytologist*,  
458 214(1), 169–179. doi: [10.1111/nph.14328](https://doi.org/10.1111/nph.14328)
- 459 Kazan, K., & Lyons, R. (2014). Intervention of phytohormone pathways by pathogen effectors.  
460 *The Plant Cell*, 26(6), 2285–2309. doi: [10.1105/tpc.114.125419](https://doi.org/10.1105/tpc.114.125419)
- 461 Kessler, A., & Halitschke, R. (2007). Specificity and complexity: the impact of herbivore-induced  
462 plant responses on arthropod community structure. *Current Opinion in Plant Biology*, 10(4),  
463 409–414. doi: [10.1016/j.pbi.2007.06.001](https://doi.org/10.1016/j.pbi.2007.06.001)
- 464 Koornneef, A., & Pieterse, C. M. J. (2008). Cross talk in defense signaling. *Plant Physiology*,  
465 146(3), 839–844. doi: [10.1104/pp.107.112029](https://doi.org/10.1104/pp.107.112029)
- 466 Kozera, B., & Rapacz, M. (2013). Reference genes in real-time PCR. *Journal of Applied Genetics*,  
467 54(4), 391–406. doi: [10.1007/s13353-013-0173-x](https://doi.org/10.1007/s13353-013-0173-x)
- 468 Kreplak, J., Madoui, M.-A., Cápál, P., Novák, P., Labadie, K., Aubert, G., ... Burstin, J. (2019).  
469 A reference genome for pea provides insight into legume genome evolution. *Nature*  
470 *Genetics*, 51(9), 1411–1422. doi: [10.1038/s41588-019-0480-1](https://doi.org/10.1038/s41588-019-0480-1)
- 471 Kulaeva, O. A., Zhernakov, A. I., Afonin, A. M., Boikov, S. S., Sulima, A. S., Tikhonovich, I. A.,  
472 & Zhukov, V. A. (2017). Pea Marker Database (PMD) – A new online database combining  
473 known pea (*Pisum sativum* L.) gene-based markers. *PLOS ONE*, 12(10), e0186713. doi:  
474 [10.1371/journal.pone.0186713](https://doi.org/10.1371/journal.pone.0186713)
- 475 Lacerda, A. F., Vasconcelos, E. A. R., Pelegri, P. B., & Grossi de Sa, M. F. (2014). Antifungal  
476 defensins and their role in plant defense. *Frontiers in Microbiology*, 5, 116. doi:  
477 [10.3389/fmicb.2014.00116](https://doi.org/10.3389/fmicb.2014.00116)

- 478 Lee, Y., Kim, Y.-C., Kim, S. Y., Lee, I.-J., Choi, D., Paek, K.-H., ... Park, J. M. (2012). A novel  
479 gibberellin 2-oxidase gene *CaGA2ox1* in pepper is specifically induced by incompatible  
480 plant pathogens. *Plant Biotechnology Reports*, 6(4), 381–390. doi: [10.1007/s11816-012-](https://doi.org/10.1007/s11816-012-0235-2)  
481 [0235-2](https://doi.org/10.1007/s11816-012-0235-2)
- 482 Lenth, R.V. 2016. Least-Squares Means: The R package lsmeans. *Journal of Statistical Software*,  
483 69:1-33.
- 484 Lin, D., Xu, Y., Wu, H., Liu, X., Zhang, L., Wang, J., & Rao, Q. (2019). Plant defense responses  
485 induced by two herbivores and consequences for whitefly *Bemisia tabaci*. *Frontiers in*  
486 *Physiology*, 10. doi: [10.3389/fphys.2019.00346](https://doi.org/10.3389/fphys.2019.00346)
- 487 Liu, X., & Hou, X. (2018). Antagonistic regulation of ABA and GA in metabolism and signaling  
488 pathways. *Frontiers in Plant Science*, 9. doi: [10.3389/fpls.2018.00251](https://doi.org/10.3389/fpls.2018.00251)
- 489 Livak, K. J., & Schmittgen, T. D. (2001). Analysis of relative gene expression data using real-time  
490 quantitative PCR and the 2(-Delta Delta C(T)) Method. *Methods (San Diego, Calif.)*, 25(4),  
491 402–408. doi: [10.1006/meth.2001.1262](https://doi.org/10.1006/meth.2001.1262)
- 492 Macedo, M. L. R., Oliveira, C. F. R., & Oliveira, C. T. (2015). Insecticidal activity of plant lectins  
493 and potential application in crop protection. *Molecules*, 20(2), 2014–2033. doi:  
494 [10.3390/molecules20022014](https://doi.org/10.3390/molecules20022014)
- 495 Mauch-Mani, B., Baccelli, I., Luna, E., & Flors, V. (2017). Defense priming: an adaptive part of  
496 induced resistance. *Annual Review of Plant Biology*, 68(1), 485–512. doi: [10.1146/annurev-](https://doi.org/10.1146/annurev-arplant-042916-041132)  
497 [arplant-042916-041132](https://doi.org/10.1146/annurev-arplant-042916-041132)
- 498 Mauck, K., Bosque-Pérez, N. A., Eigenbrode, S. D., Moraes, C. M. D., & Mescher, M. C. (2012).  
499 Transmission mechanisms shape pathogen effects on host–vector interactions: evidence from

500 plant viruses. *Functional Ecology*, 26(5), 1162–1175. doi: [10.1111/j.1365-](https://doi.org/10.1111/j.1365-2435.2012.02026.x)  
501 [2435.2012.02026.x](https://doi.org/10.1111/j.1365-2435.2012.02026.x)

502 Miller, R. N. G., Costa Alves, G. S., & Van Sluys, M.-A. (2017). Plant immunity: unravelling the  
503 complexity of plant responses to biotic stresses. *Annals of Botany*, 119(5), 681–687. doi:  
504 [10.1093/aob/mcw284](https://doi.org/10.1093/aob/mcw284)

505 Miranda, V. de J., Porto, W. F., Fernandes, G. da R., Pogue, R., Nolasco, D. O., Araujo, A. C. G.,  
506 ... Franco, O. L. (2017). Comparative transcriptomic analysis indicates genes associated with  
507 local and systemic resistance to *Colletotrichum graminicola* in maize. *Scientific Reports*,  
508 7(1), 2483. doi: [10.1038/s41598-017-02298-8](https://doi.org/10.1038/s41598-017-02298-8)

509 Mur, L. A. J., Simpson, C., Kumari, A., Gupta, A. K., & Gupta, K. J. (2017). Moving nitrogen to  
510 the centre of plant defence against pathogens. *Annals of Botany*, 119(5), 703–709. doi:  
511 [10.1093/aob/mcw179](https://doi.org/10.1093/aob/mcw179)

512 Nejat, N., & Mantri, N. (2017). Plant immune system: crosstalk between responses to biotic and  
513 abiotic stresses the missing link in understanding plant defence. *Current Issues in Molecular*  
514 *Biology*, 23, 1–16. doi: [10.21775/cimb.023.001](https://doi.org/10.21775/cimb.023.001)

515 Okada, K., Abe, H., & Arimura, G. (2015). Jasmonates induce both defense responses and  
516 communication in monocotyledonous and dicotyledonous plants. *Plant & Cell Physiology*,  
517 56(1), 16–27. doi: [10.1093/pcp/pcu158](https://doi.org/10.1093/pcp/pcu158)

518 Oksanen, F.J. Guillaume Blanchet, Michael Friendly, Roeland Kindt, Pierre Legendre, Dan  
519 McGlinn, Peter R. Minchin, R. B. O'Hara, Gavin L. Simpson, Peter Solymos, M. Henry H.  
520 Stevens, Eduard Szoecs and Helene Wagner (2019). vegan: Community ecology package. R  
521 package version 2.5-5. <https://CRAN.R-project.org/package=vegan>



- 522 Onkokesung, N., Reichelt, M., van Doorn, A., Schuurink, R. C., & Dicke, M. (2016). Differential  
523 Costs of Two Distinct Resistance Mechanisms Induced by Different Herbivore Species in  
524 *Arabidopsis*. *Plant physiology*, 170(2), 891–906. [doi:10.1104/pp.15.01780](https://doi.org/10.1104/pp.15.01780)
- 525 Pandey, P., Ramegowda, V., & Senthil-Kumar, M. (2015). Shared and unique responses of plants  
526 to multiple individual stresses and stress combinations: physiological and molecular  
527 mechanisms. *Frontiers in Plant Science*, 6. doi: [10.3389/fpls.2015.00723](https://doi.org/10.3389/fpls.2015.00723)
- 528 Patton, M. F., Bak, A., Sayre, J. M., Heck, M. L., & Casteel, C. L. (2020). A polerovirus, *Potato*  
529 *leafroll virus*, alters plant–vector interactions using three viral proteins. *Plant, Cell &*  
530 *Environment*, 43(2), 387–399. doi: [10.1111/pce.13684](https://doi.org/10.1111/pce.13684)
- 531 Petek, M., Rotter, A., Kogovšek, P., Baebler, S., Mithöfer, A., & Gruden, K. (2014). *Potato virus*  
532 *Y* infection hinders potato defence response and renders plants more vulnerable to Colorado  
533 potato beetle attack. *Molecular ecology*, 23(21), 5378–5391. doi: [org/10.1111/mec.12932](https://doi.org/10.1111/mec.12932)
- 534 Ramírez-Carrasco, G., Martínez-Aguilar, K., & Alvarez-Venegas, R. (2017). Transgenerational  
535 defense priming for crop protection against plant pathogens: A hypothesis. *Frontiers in Plant*  
536 *Science*, 8. doi: [10.3389/fpls.2017.00696](https://doi.org/10.3389/fpls.2017.00696)
- 537 Rao, X., X. Huang, Z. Zhou, and X. Lin. 2013. An improvement of the  $2^{-\Delta\Delta CT}$  method  
538 for quantitative real-time polymerase chain reaction data analysis. *Biostatistics,*  
539 *bioinformatics and biomathematics*, 3(3), 71–85.
- 540 Seguel, A., Jelenska, J., Herrera-Vásquez, A., Marr, S. K., Joyce, M. B., Gagesch, K. R., ...  
541 Holuigue, L. (2018). PROHIBITIN3 forms complexes with ISOCHORISMATE  
542 SYNTHASE1 to regulate stress-induced salicylic acid biosynthesis in *Arabidopsis*. *Plant*  
543 *Physiology*, 176(3), 2515–2531. doi: [10.1104/pp.17.00941](https://doi.org/10.1104/pp.17.00941)

- 544 Selim, S., Sanssené, J., Rossard, S., & Courtois, J. (2017). Systemic induction of the defensin and  
545 phytoalexin pisatin pathways in pea (*Pisum sativum*) against *Aphanomyces euteiches* by  
546 acetylated and nonacetylated oligogalacturonides. *Molecules*, 22(6), 1017. doi:  
547 [10.3390/molecules22061017](https://doi.org/10.3390/molecules22061017)
- 548 Serova, T. A., Tsyganova, A. V., Tikhonovich, I. A., & Tsyganov, V. E. (2019). Gibberellins  
549 inhibit nodule senescence and stimulate nodule meristem bifurcation in pea (*Pisum sativum*  
550 L.). *Frontiers in Plant Science*, 10. doi: [10.3389/fpls.2019.00285](https://doi.org/10.3389/fpls.2019.00285)
- 551 Shi, J.-H., Sun, Z., Hu, X.-J., Jin, H., Foba, C. N., Liu, H., ... Wang, M.-Q. (2019). Rice defense  
552 responses are induced upon leaf rolling by an insect herbivore. *BMC Plant Biology*, 19(1),  
553 514. doi: [10.1186/s12870-019-2116-0](https://doi.org/10.1186/s12870-019-2116-0)
- 554 Shikano, I. (2017). Evolutionary ecology of multitrophic interactions between plants, insect  
555 herbivores and entomopathogens. *Journal of Chemical Ecology*, 43(6), 586–598. doi:  
556 [10.1007/s10886-017-0850-z](https://doi.org/10.1007/s10886-017-0850-z)
- 557 Singh, N., Swain, S., Singh, A., & Nandi, A. K. (2018). AtOZF1 positively regulates defense  
558 against bacterial pathogens and npr1-independent salicylic acid signaling. *Molecular Plant-  
559 Microbe Interactions*, 31(3), 323–333. doi: [10.1094/MPMI-08-17-0208-R](https://doi.org/10.1094/MPMI-08-17-0208-R)
- 560 Stam, R., Mantelin, S., McLellan, H., & Thilliez, G. (2014). The role of effectors in nonhost  
561 resistance to filamentous plant pathogens. *Frontiers in Plant Science*, 5. doi:  
562 [10.3389/fpls.2014.00582](https://doi.org/10.3389/fpls.2014.00582)
- 563 Su, Q., Mescher, M.C., Wang, S., Chen, G., Xie, W., Wu, Q., Wang, W., & Zhang, Y. *Tomato  
564 yellow leaf curl virus* differentially influences plant defence responses to a vector and a non-  
565 vector herbivore. (2016). *Plant, Cell & Environment*, 39(3), 597-607. doi:  
566 [10.1111/pce.12650](https://doi.org/10.1111/pce.12650)

- 567
- 568 Suzuki, N. (2016). Hormone signaling pathways under stress combinations. *Plant Signaling &*  
569 *Behavior*, *11*(11), e1247139. doi: [10.1080/15592324.2016.1247139](https://doi.org/10.1080/15592324.2016.1247139)
- 570 Thaler, J. S., Agrawal, A. A., & Halitschke, R. (2010). Salicylate-mediated interactions between  
571 pathogens and herbivores. *Ecology*, *91*(4), 1075–1082. doi: [10.1890/08-2347.1](https://doi.org/10.1890/08-2347.1)
- 572 Thaler, J. S., Humphrey, P. T., & Whiteman, N. K. (2012). Evolution of jasmonate and salicylate  
573 signal crosstalk. *Trends in Plant Science*, *17*(5), 260–270. doi: [10.1016/j.tplants.2012.02.010](https://doi.org/10.1016/j.tplants.2012.02.010)
- 574 Tran, H. S., You, M. P., & Barbetti, M. J. (2018). Expression of defence-related genes in stems  
575 and leaves of resistant and susceptible field pea (*Pisum sativum*) during infection by *Phoma*  
576 *koolunga*. *Plant Pathology*, *67*(1), 156–166. doi: [10.1111/ppa.12709](https://doi.org/10.1111/ppa.12709)
- 577 van Geem, M., Gols, R., Raaijmakers, C. E., & Harvey, J. A. (2016). Effects of population-related  
578 variation in plant primary and secondary metabolites on aboveground and belowground  
579 multitrophic interactions. *Chemoecology*, *26*(6), 219–233. doi: [10.1007/s00049-016-0222-0](https://doi.org/10.1007/s00049-016-0222-0)
- 580 Vos, I. A., Moritz, L., Pieterse, C. M. J., & Van Wees, S. C. M. (2015). Impact of hormonal  
581 crosstalk on plant resistance and fitness under multi-attacker conditions. *Frontiers in Plant*  
582 *Science*, *6*. doi: [10.3389/fpls.2015.00639](https://doi.org/10.3389/fpls.2015.00639)
- 583 Wang, K., Senthil-Kumar, M., Ryu, C.-M., Kang, L., & Mysore, K. S. (2012). Phytosterols play a  
584 key role in plant innate immunity against bacterial pathogens by regulating nutrient efflux  
585 into the apoplast. *Plant Physiology*, *158*(4), 1789–1802. doi: [10.1104/pp.111.189217](https://doi.org/10.1104/pp.111.189217)
- 586 War, Abdul Rashid, Paulraj, M. G., Ahmad, T., Buhroo, A. A., Hussain, B., Ignacimuthu, S., &  
587 Sharma, H. C. (2012). Mechanisms of plant defense against insect herbivores. *Plant*  
588 *Signaling & Behavior*, *7*(10), 1306–1320. doi: [10.4161/psb.21663](https://doi.org/10.4161/psb.21663)

- 589 Wasternack, C., & Hause, B. (2013). Jasmonates: biosynthesis, perception, signal transduction and  
590 action in plant stress response, growth and development. An update to the 2007 review in  
591 *Annals of Botany*. *Annals of Botany*, *111*(6), 1021–1058. doi: [10.1093/aob/mct067](https://doi.org/10.1093/aob/mct067)
- 592 Yang, D.-L., Yang, Y., & He, Z. (2013). Roles of plant hormones and their interplay in rice  
593 immunity. *Molecular Plant*, *6*(3), 675–685. doi: [10.1093/mp/sst056](https://doi.org/10.1093/mp/sst056)
- 594 Yang, D.-L., Yao, J., Mei, C.-S., Tong, X.-H., Zeng, L.-J., Li, Q., ... He, S. Y. (2012). Plant  
595 hormone jasmonate prioritizes defense over growth by interfering with gibberellin signaling  
596 cascade. *Proceedings of the National Academy of Sciences of the United States of America*,  
597 *109*(19), E1192-1200. doi: [10.1073/pnas.1201616109](https://doi.org/10.1073/pnas.1201616109)
- 598 Yergaliyev, T. M., Nurbekova, Z., Mukiyanova, G., Akbassova, A., Sutula, M., Zhangazin, S., ...  
599 Omarov, R. T. (2016). The involvement of ROS producing aldehyde oxidase in plant  
600 response to Tombusvirus infection. *Plant Physiology and Biochemistry: PPB*, *109*, 36–44.  
601 doi: [10.1016/j.plaphy.2016.09.001](https://doi.org/10.1016/j.plaphy.2016.09.001)
- 602 Zdunek-Zastocka, E., & Sobczak, M. (2013). Expression of *Pisum sativum* *PsAO3* gene, which  
603 encodes an aldehyde oxidase utilizing abscisic aldehyde, is induced under progressively but  
604 not rapidly imposed drought stress. *Plant Physiology and Biochemistry: PPB*, *71*, 57–66.  
605 doi: [10.1016/j.plaphy.2013.06.027](https://doi.org/10.1016/j.plaphy.2013.06.027)
- 606 Zhou, S., Lou, Y.-R., Tzin, V., & Jander, G. (2015). Alteration of plant primary metabolism in  
607 response to insect herbivory. *Plant Physiology*, *169*(3), 1488–1498. doi:  
608 [10.1104/pp.15.01405](https://doi.org/10.1104/pp.15.01405)
- 609 Zhu, F., Poelman, E. H., & Dicke, M. (2014). Insect herbivore-associated organisms affect plant  
610 responses to herbivory. *New Phytologist*, *204*(2), 315–321. doi: [10.1111/nph.12886](https://doi.org/10.1111/nph.12886)
- 611

612 **Figure legends**

613 **Figure 1.** Schematic representation of  $2 \times 3$  factorial design. Green-colored aphids indicate sham  
614 (non-infective) *A. pisum*, while blue-colored aphids indicate PEMV-infective *A. pisum*. Slashes  
615 indicate order of *S. lineatus* treatments (*S. lineatus* first, *A. pisum* first, or no *S. lineatus*).

616 **Figure 2.** Relative transcript accumulation of plant hormone biosynthesis genes associated with  
617 four hormonal signaling pathways: (A) *ICS1* (salicylic acid), (B) *LOX2* (jasmonic acid), (C) *AOX3*  
618 (abscisic acid), and (D) *GA2ox* (gibberellic acid) following attack with various combinations of *S.*  
619 *lineatus*, *A. pisum*, and PEMV. Within each panel, bars separated by a different letter were  
620 significant different based on MANOVA (Tukey HSD,  $\alpha = 0.05$ ). Bar height and error bars indicate  
621 marginal mean and standard error of the regression coefficient for each respective treatment.

622 **Figure 3.** Relative transcript accumulation of plant defense response transcripts: (A) *PRI*, (B)  
623 *DDR230*, and (C) *PsLectin* following attack with various combinations of *S. lineatus*, *A. pisum*,  
624 and PEMV. Within each panel, bars separated by a different letter were significant different based  
625 on MANOVA (Tukey HSD,  $\alpha = 0.05$ ). Bar height and error bars indicate marginal mean and  
626 standard error of the regression coefficient for each respective treatment.

627 **Figure 4.** (A) Salicylic acid, (B) jasmonic acid, and (C) abscisic acid phytohormone levels in *P.*  
628 *sativum* plants following attack with various combinations of *S. lineatus*, *A. pisum*, and PEMV.  
629 Within each panel, bars not connected by the same letter are significantly different (Tukey HSD,  
630  $\alpha = 0.05$ ). Bar height and error bars indicate marginal mean and standard error of the regression  
631 coefficient for each respective treatment.

632 **Figure 5.** Nutritional analysis (total amino acid) in *P. sativum* following attack with various  
633 combinations of *S. lineatus*, *A. pisum*, and PEMV. *S. lineatus* increase total amino acid  
634 concentration in plants (GLM,  $\chi^2 = 9.194$ ,  $P = 0.01$ ). There was no “sham-none” treatment  
635 combination so that could not be estimated. Within each panel, bars not connected by the same

636 letter are significantly different (Tukey HSD,  $\alpha = 0.05$ ). Bar height and error bars indicate marginal  
637 mean and standard error of the regression coefficient for each respective treatment.

638

639 **Fig. 1**

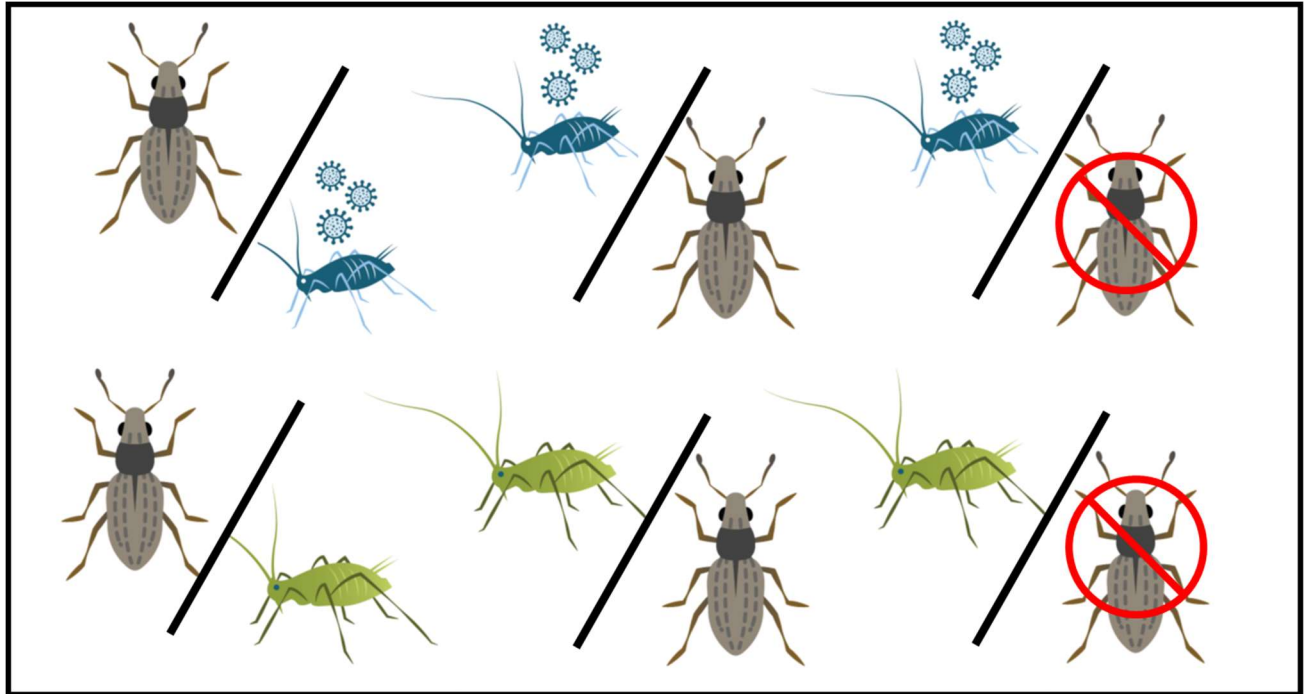

640

641 **Fig. 2**

642

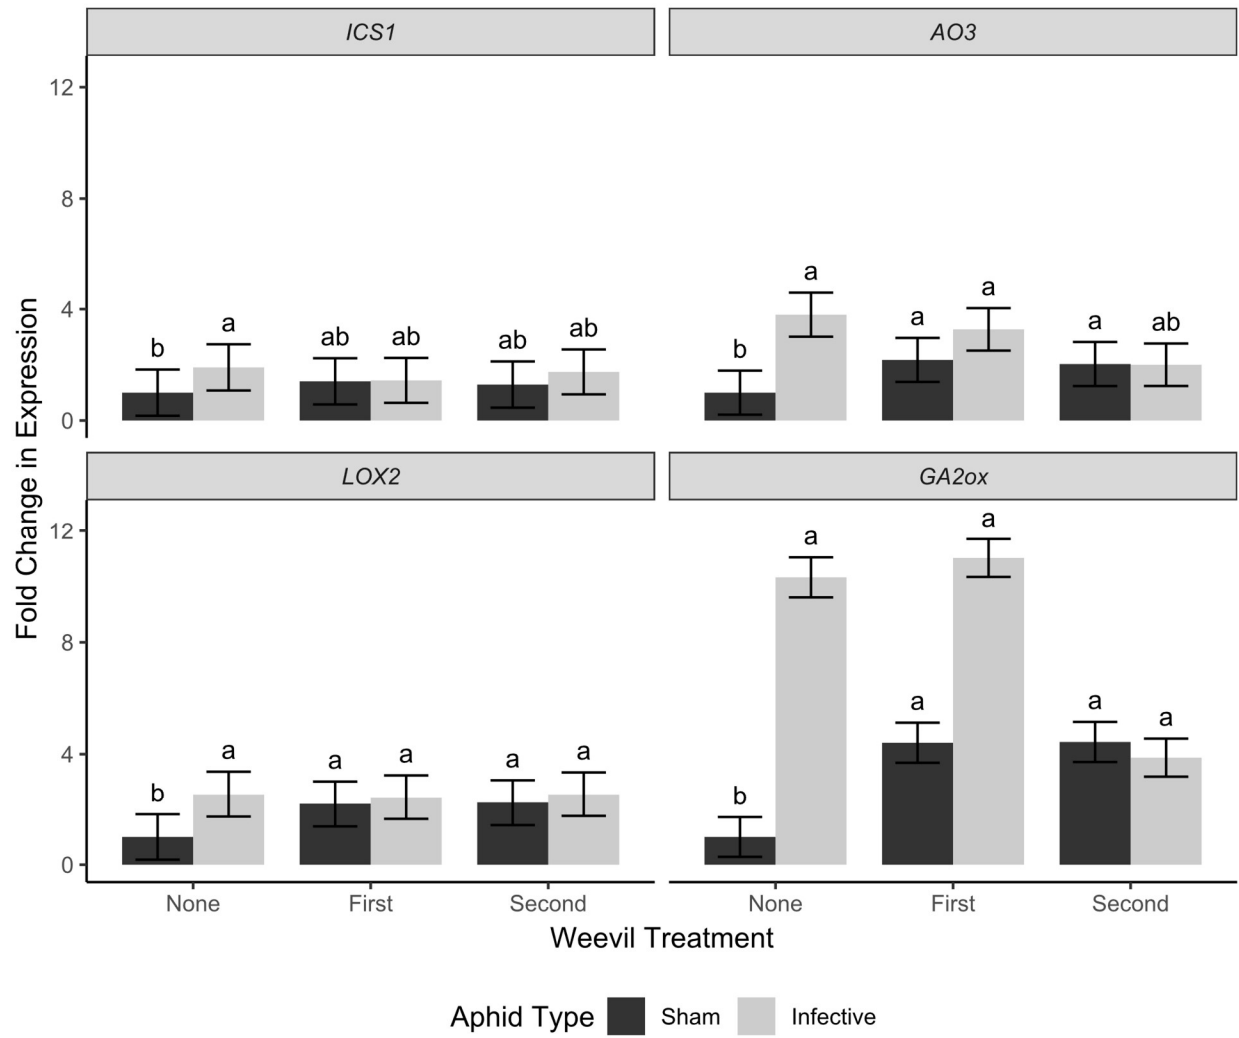

643



644 **Fig. 3**

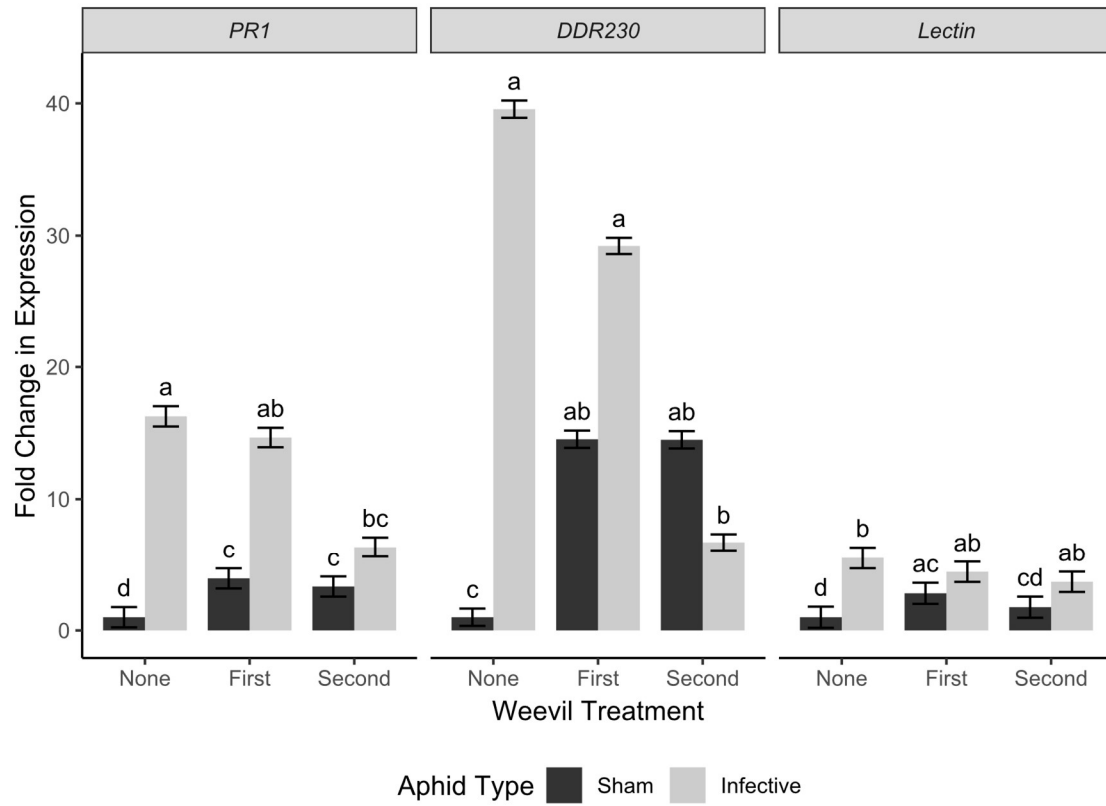

645

646

647 **Fig. 4**

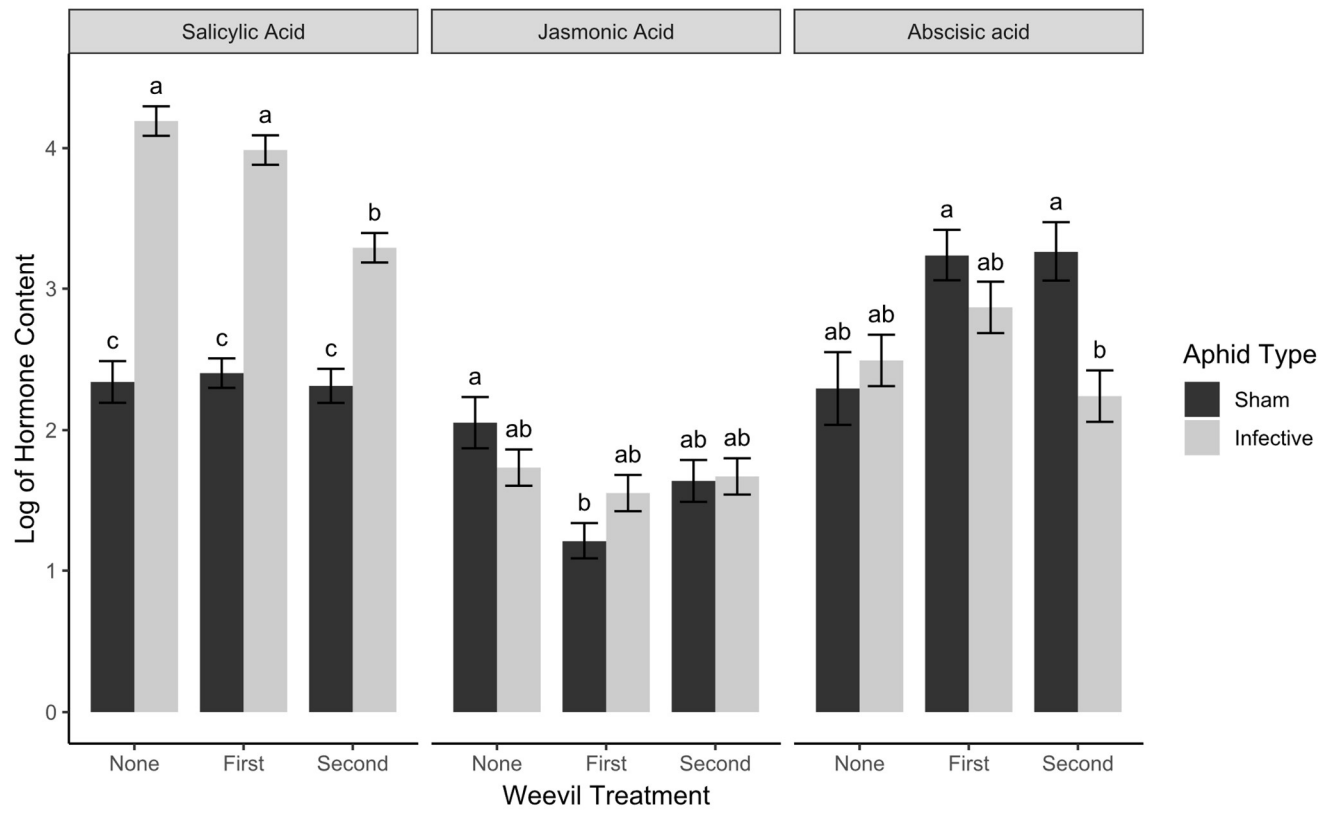

648

649 **Fig. 5**

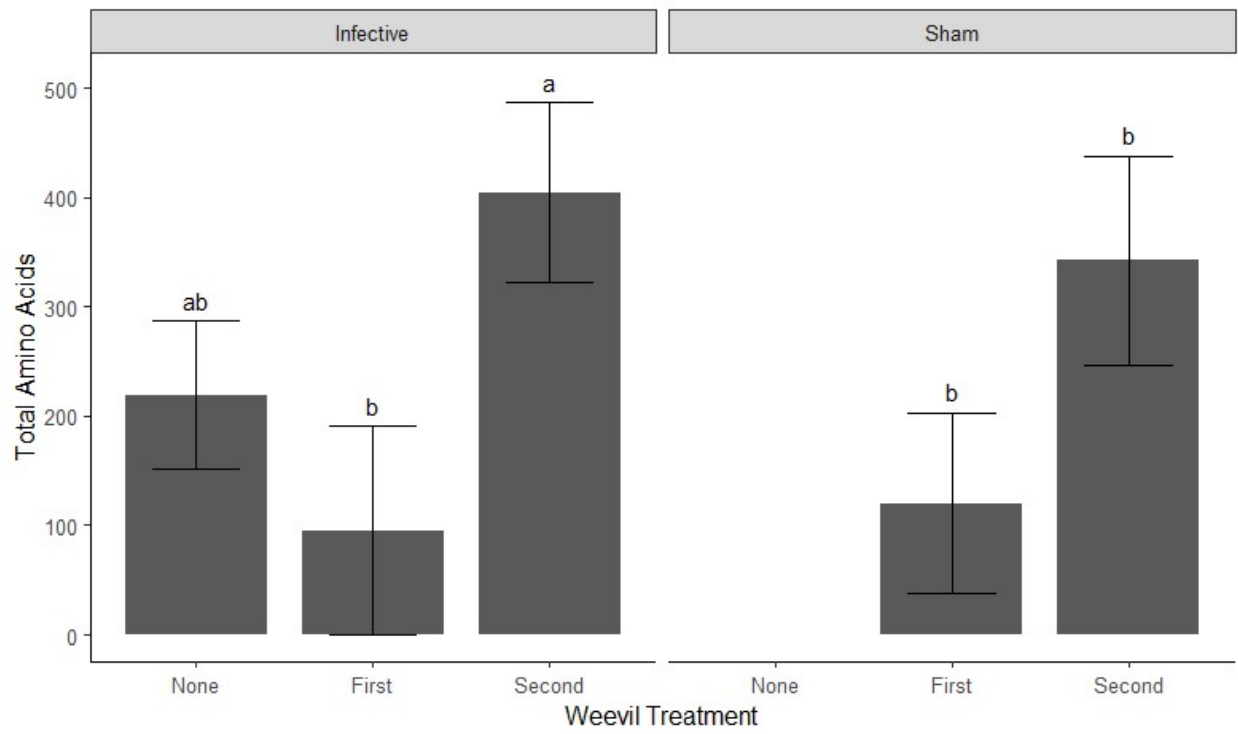

650
